# Supplementary material
Source: MDPI journal article supplement (https://www.mdpi.com/2076-3263/14/3/68)
Supplement: s1 [file s1]

**Table S1. Main active fault zones and their characters in China and adjacent seas.**

| No. | Fault name                                 |                        | strike                                   | slip type | length/km                | slip rate (mm/a) |          |                            | activity         | total Earthquake number( $M \geq 7.0$ ) | The Largest historical Earthquake ( $M \geq 5$ )  |
|-----|--------------------------------------------|------------------------|------------------------------------------|-----------|--------------------------|------------------|----------|----------------------------|------------------|-----------------------------------------|---------------------------------------------------|
|     |                                            |                        |                                          |           |                          | horizontal       | vertical | horizontal shortening rate |                  |                                         |                                                   |
| ①   | Main Frontal Thrust fault zone of Himalaya |                        | Nearly EW                                | R         | 3000 (Domestic part 410) |                  |          | 21±1.5                     | extremely strong | 1                                       | 1950-08-15 M8.6 Zayü(Tibet) Earthquake            |
| ②   | Yushu-Xianshuihe-Xiaojiang fault zone      | Garzê-Yushu fault zone | NW                                       | LL        | 600                      | 2-8              |          |                            | strong           | 5                                       | 1320 M8.0 Mani ganggo(Garzê, Sichuan) Earthquake  |
| ③   |                                            | Xianshuihe fault zone  | Western segment:NW ; Eastern segment:NNW | LL        | 400                      | 6-13             |          |                            | strong           | 8                                       | 1786-06-01 M7¾ south Kangding(Sichuan) earthquake |
| ④   |                                            | Anninghe fault         | Nearly NS                                | LL        | 180                      | 3.8-8.4          |          |                            | strong           | 2                                       | 1536-03-19 M7½ north Xichang(Sichuan) earthquake  |
| ⑤   |                                            | Zemuhe fault zone      | NNW                                      | LL        | 120                      | 5.0-9.3          |          |                            | strong           | 1                                       | 1850-09-12 M7½ Xichang-Puge(Sichuan) earthquake   |
| ⑥   |                                            | Xiaojiang fault zone   | Nearly NS                                | LL        | 420                      | 3.4-9.5          |          |                            | strong           | 4                                       | 1833-09-06 M8.0 Songming (Yunnan) earthquake      |
| ⑦   |                                            | Daliangshan fault zone | Nearly NS                                | LL        | 280                      | ≤4.5             |          |                            | moderate         |                                         | 1480-09-22 M5½ Yuexi(Sichuan) earthquake          |
| ⑧   | East Kunlun fault zone                     |                        | Nearly EW-NWW                            | LL        | 1800                     | 10±2             |          |                            | strong           | 3                                       | 2001-11-14 M8.1 west Kunlun Shankou earthquake    |

|   |                                 |                  |      |      |         |             |     |                 |    |                                                                                                                    |
|---|---------------------------------|------------------|------|------|---------|-------------|-----|-----------------|----|--------------------------------------------------------------------------------------------------------------------|
| ⑨ | Altyn Tagh fault zone           | NW-EW-NE<br>E    | LL   | 1900 | 10±2    |             |     | strong          | 3  | 2008-03-21<br>M7.3Yutian<br>(Xinjiang) earthquake                                                                  |
| ⑩ | Haiyuan fault zone              | NW-nearly<br>NS  | LL   | 650  | 2.5~8.0 |             |     | strong-moderate | 2  | 1920-12-16 M8½<br>Haiyuan(Ningxia)<br>earthquake                                                                   |
| ⑪ | North Tianshan fold-thrust belt | NWW-nearly<br>EW | R    | 870  |         | 0.8         | 5.8 | strong          | 2  | 1906-12-23 M7.7<br>Manas(Xinjiang)<br>earthquake                                                                   |
| ⑫ | North Qilianshan fault zone     | NW               | R-LL | 1000 | ≥2.0    | 3.0         |     | strong          | 6  | 1927-05-23 M 8.0<br>Gulang(Gansu)<br>earthquake                                                                    |
| ⑬ | Cona-Oiga rift                  | NNE              | N    | 260  |         | 0.3-1.<br>9 |     | strong-moderate | 1  | 1806-06-11 M7½<br>Cona(Tibet)<br>earthquake                                                                        |
| ⑭ | Yadong-Gulu rift                | NNE              | N    | 500  |         | 1.5±0.<br>5 |     | strong-moderate | 2  | 1411-10-08 M8<br>Yangbajain (Tibet)<br>earthquake                                                                  |
| ⑮ | Dinggyê-Xainza rift             | NNE              | N    | 350  |         |             |     | strong-moderate | -- | 1980-02-22 M6.6<br>south Xainza(Tibet)<br>earthquake                                                               |
| ⑯ | Gangga-Tangra Yumco rift        | Nearly NS        | N    | 380  |         |             |     | strong-moderate | -- | 1986-06-21 M6.4<br>Wenbu(Nyima,Tibet)<br>earthquake **                                                             |
| ⑰ | Nyalam-Coqen rift               | Nearly NS        | N    | 260  |         |             |     | moderate-weak   | -- | 1947-02-10 M6¼<br>Gêrzê(Tibet)<br>earthquake                                                                       |
| ⑱ | Zhongba-Dawa Co rift            | Nearly NS        | N    | 370  |         |             |     | strong-moderate | -- | 1957-04-14 M6½<br>north Zhongba<br>(Tibet) earthquake;<br>1958-10-28 M6½<br>north Zhongba<br>(Tibet) earthquake    |
| ⑲ | Jiangqu Zangbo-Gêrzê rift       | NE               | N    | 240  |         |             |     | strong-moderate | -- | 1944-10-18 M6¾<br>Ngangla Ringco<br>(Tibet) earthquake;<br>1944-10-29 M6¾<br>Ngangla Ringco<br>(Tibet) earthquake; |

|   |                                                   |                  |      |      |         |         |      |                 |    |                                                                      |
|---|---------------------------------------------------|------------------|------|------|---------|---------|------|-----------------|----|----------------------------------------------------------------------|
|   |                                                   |                  |      |      |         |         |      |                 |    | 2008-08-25 M6.8<br>Palung Co (north<br>Zhongba, Tibet)<br>earthquake |
| ⑳ | Purang-Wenbudangsang rift                         | NW-NE            | N    | 300  |         |         |      | strong-moderate | 1  | 1883-10 M7<br>Purang(Tibet)<br>earthquake                            |
| ㉑ | Bam Co-Tanggula Shankou graben system             | NE               | N    | 300  |         | 0.1-0.5 |      | moderate-week   | -- | 1971-05-22 M6.1<br>east Amdo(Tibet)<br>earthquake                    |
| ㉒ | Norma Co-Xijir Ulan Lake graben system            | NNE              | N    | 400  |         | 0.1-0.3 |      | moderate-week   | -- | 1977-11-18 M6.6<br>northeast Nyima<br>(Tibet) earthquake             |
| ㉓ | Karakoram fault zone                              | NW               | RL   | 1100 | 4-11    |         |      | strong          | 1  | 1895-07-05 M7<br>Taxkorgan (Xinjiang)<br>earthquake                  |
| ㉔ | Gyaring Co fault zone                             | NW               | RL   | 250  | 2.2-4.5 |         |      | moderate        | 1  | 1934-12-15 M7.0<br>Xainza (Tibet)<br>earthquake                      |
| ㉕ | Beng Co fault zone                                | NW               | RL   | 190  | 6-14    |         |      | strong          | 1  | 1951-11-01 M8.0<br>Beng Co(Tibet)<br>earthquake                      |
| ㉖ | Lungmu Co-Gozha Co fault zone                     | NE               | LL   | 300  |         |         |      | strong-moderate |    | 1946-11-07 M6¼<br>northeast<br>Rutog(Tibet)<br>earthquake            |
| ㉗ | Margai Caka-Rola Co fault                         | NEE              | LL   | 300  |         |         |      | moderate        | 1  | 1997-11-08 M7.5<br>Manyi(Tibet )<br>earthquake                       |
| ㉘ | Rigain Püco fault zone                            | NE               | LL   | 340  | ~1-2    |         |      | moderate        |    | 2008-01-09 M6.8<br>east Gêrzê (Tibet)<br>earthquake                  |
| ㉙ | West Kunlun frontal fold- thrust belt             | NW- nearly<br>EW | R    | 900  |         |         | 3-6  | strong-moderate | 2  | 1924-07-12 M7.2<br>east Minfeng<br>(Xinjiang) earthquake             |
| ㉚ | South Tianshan fold - thrust belt                 | Nearly EW        | R    | 1300 |         |         | 13±7 | strong          | 8  | 1902-08-22 M8¼<br>north Artux(Xinjiang)<br>earthquake                |
| ㉛ | Jinghe fault zone (Lake Alakol -Ebinur lake fault | NW               | RL/R | 800  | 4-5     |         |      | moderate        | 3  | 1812-03-08 M8                                                        |

|    |                             |                 |    |      |         |  |  |          |    |                                                                                                    |
|----|-----------------------------|-----------------|----|------|---------|--|--|----------|----|----------------------------------------------------------------------------------------------------|
|    | zone)                       |                 |    |      |         |  |  |          |    | east Nilka(Xinjiang)<br>earthquake                                                                 |
| ③② | Litang fault zone           | NW-NNW          | LL | 400  | 1.0-2.3 |  |  | moderate | 1  | 1948-05-25 M7.3<br>Litang(Sichuan)<br>Earthquake                                                   |
| ③③ | Wanding fault zone          | NE-nearly<br>EW | LL | 250  | 0.5~2.4 |  |  | moderate | 1  | 1976-05-29 M7.3<br>Longling (Yunnan)<br>earthquake                                                 |
| ③④ | Nantinghe fault zone        | NE-nearly<br>EW | LL | 500  | 0.4~4   |  |  | moderate | 1  | 1941-05-16 M7<br>Gengma(Yunnan)<br>earthquake                                                      |
| ③⑤ | Batang fault zone           | NE              | RL | 230  | 2.0~4.4 |  |  | moderate | 1  | 1870-04-11 M7¼<br>Batang(Sichuan)<br>earthquake                                                    |
| ③⑥ | Red River fault zone        | NW              | RL | 1000 | <2      |  |  | moderate | -- | --                                                                                                 |
| ③⑦ | Eshan fault zone            | NWW             | RL | 100  | 2.3~4   |  |  | moderate | 1  | 1970-01-05 M7.7<br>Tonghai(Yunnan)<br>earthquake                                                   |
| ③⑧ | Shiping fault zone          | NW-NWW          | RL | 130  | ≤3.5    |  |  | moderate | 2  | 1799-08-27 M7<br>Shiping(Yunnan)<br>earthquake;<br>1887-12-16 M7<br>Shiping(Yunnan)<br>earthquake; |
| ③⑨ | Lancang-Jinghong fault zone | NW              | RL | 300  | 2.2-3.5 |  |  | moderate | 2  | 1988-11-06 Ms7.6<br>Lancang-Gengma<br>(Yunnan)<br>earthquake                                       |
| ④⑩ | Babianjiang fault zone      | NNW             | RL | 240  |         |  |  | week     | -- | 1981-09-19 M6.0<br>Pu'er(Yunnan)<br>earthquake                                                     |
| ④⑪ | Pu'er fault zone            | NW              | RL | 120  |         |  |  | moderate | -- | 1884-11-14 M6½<br>Pu'er(Yunnan)<br>earthquake                                                      |
| ④⑫ | Sudian fault zone           | Nearly NS       | RL | 80   | 0.6-0.7 |  |  | moderate | -- | 2008-08-21 M6.1<br>Yingjiang(Yunnan)<br>earthquake;<br>2014-05-30 M6.1<br>Yingjiang (Yunnan)       |

|    |                                        |                                                               |      |     |         |         |     |                 |    |                                                                    |
|----|----------------------------------------|---------------------------------------------------------------|------|-----|---------|---------|-----|-----------------|----|--------------------------------------------------------------------|
|    |                                        |                                                               |      |     |         |         |     |                 |    | earthquake;<br>2014-05-23 M6.1<br>Yingjiang (Yunnan)<br>earthquake |
| ④③ | Longchuanjiang fault zone              | Northern<br>segment:<br>nearly NS;<br>Southern<br>segment: NE | RL   | 130 | ~0.2    |         |     | week            | -- | 1976-07-21 M6.6<br>Tengchong(Yunnan)<br>earthquake                 |
| ④④ | Maoyaba fault                          | Nearly EW                                                     | N    | 70  |         | 0.6±0.1 |     | strong-moderate | -- | --                                                                 |
| ④⑤ | Yamocuogen fault                       | Nearly EW                                                     | N    | 60  |         | ~0.3    |     | moderate        | -- | 1989-04-25 M6.6<br>east Batang(Sichuan)<br>earthquake              |
| ④⑥ | Lamaya fault                           | Nearly EW                                                     | N    | 45  |         | ~0.5    |     | moderate        | -- | --                                                                 |
| ④⑦ | Jianchuan fault zone                   | NNE                                                           | N/LL | 110 | 0.3-0.6 |         |     | moderate        | -- | 1751-05-25 M6¾<br>Jianchuan(Yunnan)<br>earthquake                  |
| ④⑧ | Haba-Yulongxueshan east piedmont fault | NW-nearly<br>NS                                               | N    | 90  |         | 0.6-1.0 |     | strong          | 1  | 1996-02-03 Ms7.0<br>Lijiang(Yunnan)<br>earthquake                  |
| ④⑨ | Diancangshan east piedmont fault       | NNW                                                           | N    | 65  |         | 0.5-1.1 |     | strong          | 1  | 1925-03-16 M7.0<br>Dali (Yunnan)<br>Earthquake                     |
| ⑤⑩ | Chenghai-binchuan fault                | NNE- nearly<br>NS                                             | N/LL | 200 | 1.0-1.2 | 0.2-0.6 |     | moderate        | 2  | 1515-06-27 M7¾<br>Yongsheng(Yunnan)<br>earthquake                  |
| ⑤⑪ | Baoshan fault                          | Nearly NS                                                     | N    | 50  |         | 0.1~0.2 |     | moderate        | -- | 2001-04-12 M6.0<br>Baoshan(Yunnan)<br>earthquake                   |
| ⑤⑫ | Minshan fault zone                     | Nearly NS                                                     | R/LL |     |         |         |     | moderate        | 5  | 1933-08-02 M7½<br>Diexi(Sichuan)<br>earthquake                     |
| ⑤⑬ | Longmenshan fault zone                 | NE                                                            | R/RL | 700 | ~3.0    | <1      | 1-4 | moderate        | 2  | 2008-05-12 M8.0<br>Wenchuan(Sichuan)<br>earthquake                 |
| ⑤⑭ | Fuyun fault zone                       | NNW                                                           | RL   | 450 | 0.8~5.0 |         |     | strong-moderate | 2  | 1931-08-11 M8.0<br>Fuyun(Xinjiang)<br>earthquake                   |

|    |                             |                                         |                |        |     |         |                    |    |                 |    |                                                                        |
|----|-----------------------------|-----------------------------------------|----------------|--------|-----|---------|--------------------|----|-----------------|----|------------------------------------------------------------------------|
| ⑤⑤ | west Junggar fault zone     |                                         | NE             | LL/R   | 260 | 0.2~3.0 |                    |    | moderate        | -- | 1941-04-05 M5½ south Tacheng(Xinjiang) earthquake                      |
| ⑤⑥ | South Altai Shan fault zone |                                         | NWW            | R      | 630 |         | 1.0-2.3            | <4 | moderate        | -- | 1961-05-21 M5½ Habahe (Xinjiang) earthquake                            |
| ⑤⑦ | Yinchuan-Hetao rift         | Hetao graben system                     | NNE- nearly EW | N      | 550 |         | 0.6-1.2            |    | strong-moderate | 1  | 1849-10-24 M7 Baotou (Inner Mongolia) earthquake                       |
| ⑤⑧ |                             | Wuhai-Yinchuan graben system            | Nearly NS      | N      | 320 |         | 0.5-1.2            |    | strong-moderate | 1  | 1739-01-03 M8 Pingluo (Yinchuan, Ningxia) earthquake                   |
| ⑤⑨ |                             | Jilantai-Alxa Left Banner graben system | NNE-nearly NS  | N      | 250 |         |                    |    | moderate-weak   | 1  | 1954-07-31 M7.0 east Minqin(Gansu) Earthquake                          |
| ⑥⑩ |                             | Yabulai graben system                   | NNE-NE         | LL & N | 320 |         | ~0.1               |    | moderate-weak   | -- | 1989-09-03 M5.4 northeast Alxa Right Banner(Inner Mongolia) earthquake |
| ⑥⑪ | Fenwei rift                 | Weihe graben system                     | Nearly EW      | N      | 300 |         | 0.2-1.1<br>1.1-2.7 |    | strong-moderate | 3  | 1556-02-02 M8¼ Huaxian(Shanxi) earthquake                              |
| ⑥⑫ |                             | Shanxi graben system                    | NE-NEE         | N/RL   | 700 |         | 0.6-1.4            |    | strong-moderate | 5  | 1303-09-25 (or 1303-09-17) M8 Hongdong-Zhaocheng (Shanxi) earthquake   |
| ⑥⑬ |                             | Yangyuan-Yanqing graben system          | NEE            | N      | 250 |         | ~0.3<br>0.4-1.0    |    | strong-week     | 1  | 1626-06-28 M7 Lingqiu (Datong, Shanxi) earthquake                      |
| ⑥⑭ | Jiyuan-Tangshan buried rift | Taihangshan front fault                 | NE-NNE         | N      | 620 |         | 0.1-0.2            |    | moderate        | 1  | 1830-06-12 M8 Cixian(Hebei) earthquake                                 |
| ⑥⑮ |                             | Xingtai-Tangshan fault                  | NE             | RL/N   | 600 | >0.3    | 0.2                |    | moderate-weak   | 3  | 1976-07-28 M7.8 Tangshan(Hebei)                                        |

|    |                                                           |                                  |           |                                                                  |      |          |         |           |                     |    |                                                       |
|----|-----------------------------------------------------------|----------------------------------|-----------|------------------------------------------------------------------|------|----------|---------|-----------|---------------------|----|-------------------------------------------------------|
|    |                                                           |                                  |           |                                                                  |      |          |         |           |                     |    | earthquake                                            |
| ⑥⑥ |                                                           | Beijing plain area fault system  | NE & NW   | NE faults: N/RL; NW faults: LL.                                  | 150  |          | ~0.21   |           | moderate-week       | 1  | 1679-09-02 M8 Sanhe(Hebei)-Pinggu(Beijing) earthquake |
| ⑥⑦ | Tanlu fault zone                                          |                                  | NE        | RL                                                               | 2400 | ~2.2-3.2 | ~0.4    |           | moderate-strong     | 3  | 1668-07-25 M8½ Tancheng (Shandong) earthquake         |
| ⑥⑧ | Changle-zhaoan fault zone                                 |                                  | NE        | N                                                                | 360  |          |         |           | week                | -- | 1185-06-15 M6½ offshore Zhangzhou (Fujian) earthquake |
| ⑥⑨ | Hongkong-Haitan Island fault zone                         |                                  | NE        | RL                                                               | 750  |          |         |           | moderate            | 3  | 1604-12-29 M7½ offshore Quanzhou(Fujian) earthquake   |
| ⑦⑩ | Longitudinal Valley fault zone in Taiwan                  | Central Range fault system       | NNE       | R                                                                | 90   |          |         | <12.8*    | strong              | 1  | 1951-11-25 M7.3 Hualien(Taiwan) earthquake            |
| ⑦⑪ |                                                           | longitudinal valley fault system | NNE       | R/LL                                                             | 150  |          | 6-10    | 22.7*     | extremely strong    |    |                                                       |
| ⑦⑫ | Pear mountain –Quchi fold- and- thrust belt               |                                  | NE-NNE    | northern segment: N; middle segment: LL; southern segment: LL/R. | 400  |          | 0.9-4.8 | 6.2*      | extremely -moderate | 3  | 2006-12-26 M7.2 offshore Hengchun(Taiwan) earthquake  |
| ⑦⑬ | West Piedmont thrust and strike-slip fault zone in Taiwan | Chelungpu fault                  | Nearly NS | R                                                                | 92   |          |         | 5.8-13.2* | strong              | 6  | 1999-09-21 M7.6 Jiji(Taiwan) earthquake               |
| ⑦⑭ |                                                           | Changhua fault                   | Nearly NS | R                                                                | 86   |          |         | 6.2*      | strong              |    | 1848-12-03 M6¾ Changhua (Taiwan)                      |

|    |  |                                                        |    |    |       |         |  |  |          |  |                                                                                                      |
|----|--|--------------------------------------------------------|----|----|-------|---------|--|--|----------|--|------------------------------------------------------------------------------------------------------|
|    |  |                                                        |    |    |       |         |  |  |          |  | earthquake                                                                                           |
| ⑦⑤ |  | the<br>right-lateral<br>strike-slip<br>fault<br>system | NE | RL | 30-40 | 0.6-2.0 |  |  | moderate |  | 1906-03-17 M7.1<br>Meishan(Taiwan)<br>earthquake;<br>1935-04-21 M7.1<br>Miaoli(Taiwan)<br>earthquake |

**Note:** 1. The historical largest earthquake data from Lou, 1996 [169]; Mao et al. 2003 [170]; <http://www.csndmc.ac.cn/index/main> (accessed on 1 July 2023).; and those with “\*” from Zhou, 1997 [171].

2. In column “The Largest Earthquake”, “1906-03-17” stands for “yy-mm-dd”. Date of origin since 4th Jan. 1970 in Coordinated Universal Time(UTC), those before 4th Jan. 1970 in Beijing time, and those marked “\*\*\*” in the local time.

3. The fault slip rate is obtained from field investigations or previous studies, including geology, tectonic geomorphology or GPS observation, with references in chapter 4. Note that the slip rate in Taiwan region with “\*” is a dip-slip rate or a rake-slip rate (see in Shyu et al, 2016) [116].

4. The locations of the fault zones see in Figure 4.

5. Slip type, R: reverse; N: normal; LL: left-lateral fault; RL: right-lateral. For oblique-slip fault, the subordinate sense of slip is listed after the primary slip type.
